# Supplementary material
Source: MDPI journal article supplement (https://www.mdpi.com/2073-4352/2/3/1201)
Supplement: s1 [file s1]

# 1. SUBMISSION DETAILS

_publ_contact_author
;
        Martin Nieger
        Laboratory of Inorganic Chemistry
        Department of Chemistry
        Universitity of Helsinki
        P.O. Box 55
        FIN-00014 University of Helsinki
        Finland
;
_publ_contact_author_phone        '++358 9 191 50192'
_publ_contact_author_fax          '++358 9 191 50198'
_publ_contact_author_email        'martin.nieger@helsinki.fi'
_publ_requested_journal           'Crystals'
_publ_requested_coeditor_name     ?

_publ_contact_letter
;
 enclosed you will find the necessary data for our publication in
 Crystals
;

#==============================================================================

# 3. TITLE AND AUTHOR LIST

_publ_section_title
;
 Synthesis and Crystal Structure of Benzyl [(1S)-1-(5-Amino-1,3,4-oxadiazol-2-
 yl)-2-phenylethyl]carbamate
;

loop_
 _publ_author_name
 _publ_author_address
     'Loser, Reik'
;    Pharmazeutisches Institut
      Pharmazeutische Chemie I
      Universit\"at Bonn
      An der Immenburg 4
      D-53121 Bonn
      Germany
;
     'Nieger, Martin'
;    Laboratory of Inorganic Chemistry
      Department of Chemistry
      Universitity of Helsinki
      P.O. Box 55
      FIN-00014 University of Helsinki
      Finland
;
     'Gutschow, Michael'
;    Pharmazeutisches Institut
      Pharmazeutische Chemie I
      Universit\"at Bonn
      An der Immenburg 4
      D-53121 Bonn
      Germany
;

#==============================================================================

 
data_pharm30 
 
_audit_creation_method            SHELXL-97 
_chemical_name_systematic 
; 
 Benzyl[(1S)-1-(5-Amino-1,3,4-oxadiazol-2-yl)-2-phenylethyl]carbamate
; 
_chemical_name_common             ? 
_chemical_melting_point           ? 
_chemical_formula_moiety          'C18 H18 N4 O3'  
_chemical_formula_sum 
 'C18 H18 N4 O3' 
_chemical_formula_weight          338.36 
_chemical_absolute_configuration  syn


 
loop_ 
 _atom_type_symbol 
 _atom_type_description 
 _atom_type_scat_dispersion_real 
 _atom_type_scat_dispersion_imag 
 _atom_type_scat_source 
 'C'  'C'   0.0033   0.0016 
 'International Tables Vol C Tables 4.2.6.8 and 6.1.1.4' 
 'H'  'H'   0.0000   0.0000 
 'International Tables Vol C Tables 4.2.6.8 and 6.1.1.4' 
 'N'  'N'   0.0061   0.0033 
 'International Tables Vol C Tables 4.2.6.8 and 6.1.1.4' 
 'O'  'O'   0.0106   0.0060 
 'International Tables Vol C Tables 4.2.6.8 and 6.1.1.4' 
 
_symmetry_cell_setting            monoclinic 
_symmetry_space_group_name_H-M    'P 21' 
 
loop_ 
 _symmetry_equiv_pos_as_xyz 
 'x, y, z' 
 '-x, y+1/2, -z' 
 
_cell_length_a                    9.8152(2) 
_cell_length_b                    9.6305(2) 
_cell_length_c                    9.8465(2) 
_cell_angle_alpha                 90.00 
_cell_angle_beta                  116.785(1) 
_cell_angle_gamma                 90.00 
_cell_volume                      830.88(3) 
_cell_formula_units_Z             2 
_cell_measurement_temperature     123(2) 
_cell_measurement_reflns_used     2015 
_cell_measurement_theta_min       1 
_cell_measurement_theta_max       27.5 
 
_exptl_crystal_description        plates 
_exptl_crystal_colour             colourless 
_exptl_crystal_size_max           0.30 
_exptl_crystal_size_mid           0.20 
_exptl_crystal_size_min           0.10 
_exptl_crystal_density_meas       none 
_exptl_crystal_density_diffrn     1.352 
_exptl_crystal_density_method     'not measured' 
_exptl_crystal_F_000              356 
_exptl_absorpt_coefficient_mu     0.095 
_exptl_absorpt_correction_type    none 
_exptl_absorpt_correction_T_min   ?
_exptl_absorpt_correction_T_max   ?
_exptl_absorpt_process_details    ? 
 
_exptl_special_details 
; 
 dx = 40 mm, 60 sec./deg., 2 deg., 9 sets, 369 frames, mos.= 0.393(2) deg. 
; 
 
_diffrn_ambient_temperature       123(2) 
_diffrn_radiation_wavelength      0.71073 
_diffrn_radiation_type            MoK\a 
_diffrn_radiation_source          'fine-focus sealed tube' 
_diffrn_radiation_monochromator   graphite 
_diffrn_measurement_device_type   'Nonius KappaCCD' 
_diffrn_measurement_method        'rotation in phi and omega, 2 deg.' 
_diffrn_detector_area_resol_mean  ? 
_diffrn_standards_number          ? 
_diffrn_standards_interval_count  ? 
_diffrn_standards_interval_time   ? 
_diffrn_standards_decay_%         ? 
_diffrn_reflns_number             15066 
_diffrn_reflns_av_R_equivalents   0.0343 
_diffrn_reflns_av_sigmaI/netI     0.0356 
_diffrn_reflns_limit_h_min        -12 
_diffrn_reflns_limit_h_max        12 
_diffrn_reflns_limit_k_min        -12 
_diffrn_reflns_limit_k_max        12 
_diffrn_reflns_limit_l_min        -12 
_diffrn_reflns_limit_l_max        12 
_diffrn_reflns_theta_min          3.14 
_diffrn_reflns_theta_max          27.48 
_reflns_number_total              3795 
_reflns_number_gt                 3428 
_reflns_threshold_expression      >2sigma(I) 
 
_computing_data_collection        Collect 
_computing_cell_refinement        DENZO-SMN 
_computing_data_reduction         DENZO-SMN 
_computing_structure_solution     'SHELXS-97 (Sheldrick, 1990)' 
_computing_structure_refinement   'SHELXL-97 (Sheldrick, 1997)' 
_computing_molecular_graphics     XP 
_computing_publication_material   'SHELXL-97 (Sheldrick, 1997)'  
 
_refine_special_details 
; 
 Refinement of F^2^ against ALL reflections.  The weighted R-factor wR and 
 goodness of fit S are based on F^2^, conventional R-factors R are based 
 on F, with F set to zero for negative F^2^. The threshold expression of 
 F^2^ > 2sigma(F^2^) is used only for calculating R-factors(gt) etc. and is 
 not relevant to the choice of reflections for refinement.  R-factors based 
 on F^2^ are statistically about twice as large as those based on F, and R- 
 factors based on ALL data will be even larger.
 
 The absolute configuration has not been established by anomalous dispersion
 effects in diffraction measurement on the crystal. The enantiome has been
 assigned by reference to an unchanging chiral centre in the synthetic
 procedure.

 Determination of absolute structure using Bayesian statistics on Bijvoet 
 differences (Hooft, Straver and Spek, 2008): y = 0.0(5) 
 (Platon: Spek, 2003).
; 
 
_refine_ls_structure_factor_coef  Fsqd  
_refine_ls_matrix_type            full 
_refine_ls_weighting_scheme       calc  
_refine_ls_weighting_details 
 'calc w=1/[\s^2^(Fo^2^)+(0.0346P)^2^+0.0000P] where P=(Fo^2^+2Fc^2^)/3' 
_atom_sites_solution_primary      direct 
_atom_sites_solution_secondary    difmap 
_atom_sites_solution_hydrogens    geom 
_refine_ls_hydrogen_treatment     mixed 
_refine_ls_extinction_method      none 
_refine_ls_extinction_coef        ? 
_refine_ls_abs_structure_details 
 'Flack H D (1983), Acta Cryst. A39, 876-881' 
_refine_ls_abs_structure_Flack    -0.1(6)
_refine_ls_number_reflns          3795 
_refine_ls_number_parameters      235 
_refine_ls_number_restraints      4 
_refine_ls_R_factor_all           0.0340 
_refine_ls_R_factor_gt            0.0288 
_refine_ls_wR_factor_ref          0.0621 
_refine_ls_wR_factor_gt           0.0607 
_refine_ls_goodness_of_fit_ref    0.985 
_refine_ls_restrained_S_all       0.985 
_refine_ls_shift/su_max           0.000 
_refine_ls_shift/su_mean          0.000 
 
loop_ 
 _atom_site_label 
 _atom_site_type_symbol 
 _atom_site_fract_x 
 _atom_site_fract_y 
 _atom_site_fract_z 
 _atom_site_U_iso_or_equiv 
 _atom_site_adp_type 
 _atom_site_occupancy 
 _atom_site_symmetry_multiplicity 
 _atom_site_calc_flag 
 _atom_site_refinement_flags 
 _atom_site_disorder_assembly 
 _atom_site_disorder_group 
O1 O 0.47601(9) 0.26310(9) 0.02715(8) 0.02319(19) Uani 1 1 d . . . 
O2 O 0.63947(9) 0.13846(8) 0.23301(8) 0.02214(19) Uani 1 1 d . . . 
O3 O 0.44216(9) 0.58392(8) 0.22685(8) 0.02077(18) Uani 1 1 d . . . 
N1 N 0.46291(11) 0.26433(11) 0.25319(11) 0.0195(2) Uani 1 1 d D . . 
H1 H 0.5008(14) 0.2308(13) 0.3446(13) 0.023 Uiso 1 1 d D . . 
N2 N 0.38291(11) 0.53027(10) 0.41224(10) 0.0231(2) Uani 1 1 d . . . 
N3 N 0.45185(11) 0.66416(11) 0.44186(11) 0.0243(2) Uani 1 1 d . . . 
N4 N 0.55662(13) 0.79742(11) 0.30641(13) 0.0273(2) Uani 1 1 d D . . 
H4A H 0.5503(16) 0.8068(17) 0.2153(15) 0.041 Uiso 1 1 d D . . 
H4B H 0.5762(17) 0.8724(15) 0.3645(16) 0.041 Uiso 1 1 d D . . 
C1 C 0.52119(12) 0.22646(11) 0.15868(12) 0.0174(2) Uani 1 1 d . . . 
C2 C 0.71802(13) 0.08879(13) 0.14811(13) 0.0237(3) Uani 1 1 d . . . 
H2A H 0.7394 0.1669 0.0953 0.028 Uiso 1 1 calc R . . 
H2B H 0.6543 0.0198 0.0711 0.028 Uiso 1 1 calc R . . 
C3 C 0.86487(13) 0.02304(12) 0.26042(12) 0.0197(2) Uani 1 1 d . . . 
C4 C 0.89012(14) -0.11790(12) 0.25619(13) 0.0239(3) Uani 1 1 d . . . 
H4 H 0.8122 -0.1753 0.1845 0.029 Uiso 1 1 calc R . . 
C5 C 1.02973(15) -0.17604(14) 0.35682(13) 0.0301(3) Uani 1 1 d . . . 
H5 H 1.0471 -0.2726 0.3523 0.036 Uiso 1 1 calc R . . 
C6 C 1.14222(15) -0.09385(15) 0.46255(14) 0.0312(3) Uani 1 1 d . . . 
H6 H 1.2372 -0.1336 0.5307 0.037 Uiso 1 1 calc R . . 
C7 C 1.11690(14) 0.04648(14) 0.46956(14) 0.0289(3) Uani 1 1 d . . . 
H7 H 1.1939 0.1031 0.5435 0.035 Uiso 1 1 calc R . . 
C8 C 0.97918(14) 0.10453(14) 0.36884(13) 0.0249(3) Uani 1 1 d . . . 
H8 H 0.9625 0.2012 0.3738 0.030 Uiso 1 1 calc R . . 
C9 C 0.32901(12) 0.35219(12) 0.20701(12) 0.0186(2) Uani 1 1 d . . . 
H9 H 0.2845 0.3682 0.0948 0.022 Uiso 1 1 calc R . . 
C10 C 0.20729(13) 0.28350(12) 0.24211(13) 0.0209(3) Uani 1 1 d . . . 
H10A H 0.1994 0.1840 0.2144 0.025 Uiso 1 1 calc R . . 
H10B H 0.2396 0.2895 0.3528 0.025 Uiso 1 1 calc R . . 
C11 C 0.05225(12) 0.35056(12) 0.15713(12) 0.0202(2) Uani 1 1 d . . . 
C12 C -0.03254(13) 0.32281(13) 0.00241(13) 0.0253(3) Uani 1 1 d . . . 
H12 H 0.0078 0.2624 -0.0468 0.030 Uiso 1 1 calc R . . 
C13 C -0.17495(14) 0.38230(14) -0.08060(14) 0.0302(3) Uani 1 1 d . . . 
H13 H -0.2307 0.3644 -0.1865 0.036 Uiso 1 1 calc R . . 
C14 C -0.23569(14) 0.46761(13) -0.00908(15) 0.0311(3) Uani 1 1 d . . . 
H14 H -0.3340 0.5074 -0.0655 0.037 Uiso 1 1 calc R . . 
C15 C -0.15367(14) 0.49516(13) 0.14436(15) 0.0298(3) Uani 1 1 d . . . 
H15 H -0.1960 0.5533 0.1936 0.036 Uiso 1 1 calc R . . 
C16 C -0.00918(14) 0.43816(12) 0.22720(14) 0.0244(3) Uani 1 1 d . . . 
H16 H 0.0477 0.4593 0.3322 0.029 Uiso 1 1 calc R . . 
C17 C 0.37896(12) 0.48918(12) 0.28665(12) 0.0185(2) Uani 1 1 d . . . 
C18 C 0.48462(13) 0.68846(12) 0.33070(12) 0.0201(3) Uani 1 1 d . . . 
 
loop_ 
 _atom_site_aniso_label 
 _atom_site_aniso_U_11 
 _atom_site_aniso_U_22 
 _atom_site_aniso_U_33 
 _atom_site_aniso_U_23 
 _atom_site_aniso_U_13 
 _atom_site_aniso_U_12 
O1 0.0238(4) 0.0301(5) 0.0163(4) 0.0042(3) 0.0096(3) 0.0054(4) 
O2 0.0224(4) 0.0286(5) 0.0172(4) 0.0036(3) 0.0105(3) 0.0084(4) 
O3 0.0241(4) 0.0220(4) 0.0173(4) -0.0002(3) 0.0103(3) -0.0013(3) 
N1 0.0198(5) 0.0249(5) 0.0135(4) 0.0026(4) 0.0073(4) 0.0051(4) 
N2 0.0260(5) 0.0233(5) 0.0211(5) -0.0039(4) 0.0116(4) -0.0045(5) 
N3 0.0276(6) 0.0237(5) 0.0213(5) -0.0044(4) 0.0106(4) -0.0059(5) 
N4 0.0308(6) 0.0235(6) 0.0262(6) 0.0001(4) 0.0116(5) -0.0049(4) 
C1 0.0153(5) 0.0172(6) 0.0178(6) -0.0007(4) 0.0058(4) -0.0015(4) 
C2 0.0249(6) 0.0296(7) 0.0190(6) 0.0013(5) 0.0118(5) 0.0085(5) 
C3 0.0217(6) 0.0237(6) 0.0180(5) 0.0027(5) 0.0128(5) 0.0027(5) 
C4 0.0254(6) 0.0245(7) 0.0225(6) -0.0013(5) 0.0114(5) 0.0000(5) 
C5 0.0382(8) 0.0245(7) 0.0292(7) 0.0041(5) 0.0165(6) 0.0093(6) 
C6 0.0226(6) 0.0440(8) 0.0253(6) 0.0105(6) 0.0093(5) 0.0096(6) 
C7 0.0240(7) 0.0360(8) 0.0245(6) 0.0011(5) 0.0090(5) -0.0082(6) 
C8 0.0301(7) 0.0226(6) 0.0231(6) 0.0013(5) 0.0129(5) -0.0009(5) 
C9 0.0182(6) 0.0209(6) 0.0158(5) 0.0000(5) 0.0070(4) 0.0019(5) 
C10 0.0212(6) 0.0211(6) 0.0208(6) -0.0002(5) 0.0099(5) 0.0002(5) 
C11 0.0185(6) 0.0196(6) 0.0236(6) 0.0026(5) 0.0104(5) -0.0013(5) 
C12 0.0211(6) 0.0319(7) 0.0247(6) -0.0018(5) 0.0119(5) -0.0024(5) 
C13 0.0215(6) 0.0409(8) 0.0252(6) 0.0022(6) 0.0077(5) -0.0033(6) 
C14 0.0203(6) 0.0271(7) 0.0417(8) 0.0094(6) 0.0102(6) 0.0030(5) 
C15 0.0286(7) 0.0215(7) 0.0426(8) -0.0001(6) 0.0189(6) 0.0025(5) 
C16 0.0263(6) 0.0210(6) 0.0261(6) -0.0001(5) 0.0120(5) 0.0004(5) 
C17 0.0169(5) 0.0220(6) 0.0171(5) 0.0030(4) 0.0081(5) 0.0024(5) 
C18 0.0175(6) 0.0205(6) 0.0191(6) 0.0002(5) 0.0055(5) 0.0018(5) 
 
_geom_special_details 
; 
 All esds (except the esd in the dihedral angle between two l.s. planes) 
 are estimated using the full covariance matrix.  The cell esds are taken 
 into account individually in the estimation of esds in distances, angles 
 and torsion angles; correlations between esds in cell parameters are only 
 used when they are defined by crystal symmetry.  An approximate (isotropic) 
 treatment of cell esds is used for estimating esds involving l.s. planes. 
; 
 
loop_ 
 _geom_bond_atom_site_label_1 
 _geom_bond_atom_site_label_2 
 _geom_bond_distance 
 _geom_bond_site_symmetry_2 
 _geom_bond_publ_flag 
O1 C1 1.2168(13) . ? 
O2 C1 1.3550(13) . ? 
O2 C2 1.4501(13) . ? 
O3 C18 1.3597(14) . ? 
O3 C17 1.3759(14) . ? 
N1 C1 1.3440(15) . ? 
N1 C9 1.4530(14) . ? 
N1 H1 0.867(12) . ? 
N2 C17 1.2822(14) . ? 
N2 N3 1.4239(13) . ? 
N3 C18 1.2936(15) . ? 
N4 C18 1.3454(16) . ? 
N4 H4A 0.876(12) . ? 
N4 H4B 0.887(13) . ? 
C2 C3 1.5049(16) . ? 
C2 H2A 0.9900 . ? 
C2 H2B 0.9900 . ? 
C3 C4 1.3837(17) . ? 
C3 C8 1.3911(16) . ? 
C4 C5 1.3962(17) . ? 
C4 H4 0.9500 . ? 
C5 C6 1.3760(19) . ? 
C5 H5 0.9500 . ? 
C6 C7 1.3814(19) . ? 
C6 H6 0.9500 . ? 
C7 C8 1.3838(17) . ? 
C7 H7 0.9500 . ? 
C8 H8 0.9500 . ? 
C9 C17 1.4998(16) . ? 
C9 C10 1.5351(16) . ? 
C9 H9 1.0000 . ? 
C10 C11 1.5118(16) . ? 
C10 H10A 0.9900 . ? 
C10 H10B 0.9900 . ? 
C11 C16 1.3878(16) . ? 
C11 C12 1.3936(16) . ? 
C12 C13 1.3858(17) . ? 
C12 H12 0.9500 . ? 
C13 C14 1.3801(19) . ? 
C13 H13 0.9500 . ? 
C14 C15 1.3801(18) . ? 
C14 H14 0.9500 . ? 
C15 C16 1.3912(16) . ? 
C15 H15 0.9500 . ? 
C16 H16 0.9500 . ? 
 
loop_ 
 _geom_angle_atom_site_label_1 
 _geom_angle_atom_site_label_2 
 _geom_angle_atom_site_label_3 
 _geom_angle 
 _geom_angle_site_symmetry_1 
 _geom_angle_site_symmetry_3 
 _geom_angle_publ_flag 
C1 O2 C2 116.34(8) . . ? 
C18 O3 C17 102.34(9) . . ? 
C1 N1 C9 123.26(9) . . ? 
C1 N1 H1 120.1(9) . . ? 
C9 N1 H1 116.5(9) . . ? 
C17 N2 N3 106.39(10) . . ? 
C18 N3 N2 105.48(9) . . ? 
C18 N4 H4A 117.5(10) . . ? 
C18 N4 H4B 119.9(10) . . ? 
H4A N4 H4B 118.1(15) . . ? 
O1 C1 N1 126.41(10) . . ? 
O1 C1 O2 124.67(11) . . ? 
N1 C1 O2 108.91(9) . . ? 
O2 C2 C3 107.29(9) . . ? 
O2 C2 H2A 110.3 . . ? 
C3 C2 H2A 110.3 . . ? 
O2 C2 H2B 110.3 . . ? 
C3 C2 H2B 110.3 . . ? 
H2A C2 H2B 108.5 . . ? 
C4 C3 C8 118.88(11) . . ? 
C4 C3 C2 121.05(11) . . ? 
C8 C3 C2 120.05(11) . . ? 
C3 C4 C5 120.25(12) . . ? 
C3 C4 H4 119.9 . . ? 
C5 C4 H4 119.9 . . ? 
C6 C5 C4 120.17(13) . . ? 
C6 C5 H5 119.9 . . ? 
C4 C5 H5 119.9 . . ? 
C5 C6 C7 119.96(12) . . ? 
C5 C6 H6 120.0 . . ? 
C7 C6 H6 120.0 . . ? 
C6 C7 C8 119.94(12) . . ? 
C6 C7 H7 120.0 . . ? 
C8 C7 H7 120.0 . . ? 
C7 C8 C3 120.77(12) . . ? 
C7 C8 H8 119.6 . . ? 
C3 C8 H8 119.6 . . ? 
N1 C9 C17 108.19(9) . . ? 
N1 C9 C10 111.38(9) . . ? 
C17 C9 C10 111.44(9) . . ? 
N1 C9 H9 108.6 . . ? 
C17 C9 H9 108.6 . . ? 
C10 C9 H9 108.6 . . ? 
C11 C10 C9 112.50(9) . . ? 
C11 C10 H10A 109.1 . . ? 
C9 C10 H10A 109.1 . . ? 
C11 C10 H10B 109.1 . . ? 
C9 C10 H10B 109.1 . . ? 
H10A C10 H10B 107.8 . . ? 
C16 C11 C12 118.74(11) . . ? 
C16 C11 C10 122.61(10) . . ? 
C12 C11 C10 118.65(11) . . ? 
C13 C12 C11 120.81(12) . . ? 
C13 C12 H12 119.6 . . ? 
C11 C12 H12 119.6 . . ? 
C14 C13 C12 119.87(12) . . ? 
C14 C13 H13 120.1 . . ? 
C12 C13 H13 120.1 . . ? 
C15 C14 C13 120.00(12) . . ? 
C15 C14 H14 120.0 . . ? 
C13 C14 H14 120.0 . . ? 
C14 C15 C16 120.23(12) . . ? 
C14 C15 H15 119.9 . . ? 
C16 C15 H15 119.9 . . ? 
C11 C16 C15 120.32(11) . . ? 
C11 C16 H16 119.8 . . ? 
C15 C16 H16 119.8 . . ? 
N2 C17 O3 112.61(10) . . ? 
N2 C17 C9 129.53(10) . . ? 
O3 C17 C9 117.63(9) . . ? 
N3 C18 N4 129.96(11) . . ? 
N3 C18 O3 113.17(10) . . ? 
N4 C18 O3 116.83(10) . . ? 
 
loop_ 
 _geom_torsion_atom_site_label_1 
 _geom_torsion_atom_site_label_2 
 _geom_torsion_atom_site_label_3 
 _geom_torsion_atom_site_label_4 
 _geom_torsion 
 _geom_torsion_site_symmetry_1 
 _geom_torsion_site_symmetry_2 
 _geom_torsion_site_symmetry_3 
 _geom_torsion_site_symmetry_4 
 _geom_torsion_publ_flag 
C17 N2 N3 C18 -1.03(12) . . . . ? 
C9 N1 C1 O1 3.02(19) . . . . ? 
C9 N1 C1 O2 -176.41(10) . . . . ? 
C2 O2 C1 O1 1.60(16) . . . . ? 
C2 O2 C1 N1 -178.96(9) . . . . ? 
C1 O2 C2 C3 166.49(10) . . . . ? 
O2 C2 C3 C4 114.30(12) . . . . ? 
O2 C2 C3 C8 -67.01(13) . . . . ? 
C8 C3 C4 C5 -1.63(18) . . . . ? 
C2 C3 C4 C5 177.08(10) . . . . ? 
C3 C4 C5 C6 1.08(19) . . . . ? 
C4 C5 C6 C7 0.20(19) . . . . ? 
C5 C6 C7 C8 -0.89(19) . . . . ? 
C6 C7 C8 C3 0.31(19) . . . . ? 
C4 C3 C8 C7 0.95(18) . . . . ? 
C2 C3 C8 C7 -177.77(11) . . . . ? 
C1 N1 C9 C17 -111.31(11) . . . . ? 
C1 N1 C9 C10 125.88(11) . . . . ? 
N1 C9 C10 C11 -163.62(9) . . . . ? 
C17 C9 C10 C11 75.46(11) . . . . ? 
C9 C10 C11 C16 -104.91(12) . . . . ? 
C9 C10 C11 C12 75.35(13) . . . . ? 
C16 C11 C12 C13 0.55(18) . . . . ? 
C10 C11 C12 C13 -179.70(11) . . . . ? 
C11 C12 C13 C14 -1.51(19) . . . . ? 
C12 C13 C14 C15 0.95(19) . . . . ? 
C13 C14 C15 C16 0.54(19) . . . . ? 
C12 C11 C16 C15 0.95(17) . . . . ? 
C10 C11 C16 C15 -178.79(11) . . . . ? 
C14 C15 C16 C11 -1.51(19) . . . . ? 
N3 N2 C17 O3 0.83(12) . . . . ? 
N3 N2 C17 C9 175.12(10) . . . . ? 
C18 O3 C17 N2 -0.31(12) . . . . ? 
C18 O3 C17 C9 -175.34(9) . . . . ? 
N1 C9 C17 N2 -93.85(14) . . . . ? 
C10 C9 C17 N2 28.92(16) . . . . ? 
N1 C9 C17 O3 80.20(11) . . . . ? 
C10 C9 C17 O3 -157.03(9) . . . . ? 
N2 N3 C18 N4 -176.96(12) . . . . ? 
N2 N3 C18 O3 0.89(13) . . . . ? 
C17 O3 C18 N3 -0.41(12) . . . . ? 
C17 O3 C18 N4 177.74(10) . . . . ? 
 
loop_ 
 _geom_hbond_atom_site_label_D 
 _geom_hbond_atom_site_label_H 
 _geom_hbond_atom_site_label_A 
 _geom_hbond_distance_DH 
 _geom_hbond_distance_HA 
 _geom_hbond_distance_DA 
 _geom_hbond_angle_DHA 
 _geom_hbond_site_symmetry_A 
N1 H1 N3  0.867(12) 2.041(12) 2.8952(14) 168.2(12) 2_646 
N4 H4A O1  0.876(12) 2.321(13) 3.1704(14) 163.5(14) 2_655 
N4 H4B N2  0.887(13) 2.552(14) 3.4020(15) 160.9(13) 2_656 
 
_diffrn_measured_fraction_theta_max    0.994 
_diffrn_reflns_theta_full              25.00 
_diffrn_measured_fraction_theta_full   0.996 
_refine_diff_density_max    0.116 
_refine_diff_density_min   -0.193 
_refine_diff_density_rms    0.037 
#==============================================================================
#_eof # End of Crystallographic Information File
